# Supplementary material for: Implementation Determinants of Transition Planning in Residential Out-of-Home Care for Young People with Disability and from Multicultural and Multifaith Backgrounds
Source: Research Square preprint supplement (doi:10.21203/rs.3.rs-7662046/v1), 2025-10-09
Supplement: Supplementary file 1 [file bc83d8ac62e46c840396629c.docx]

Supplementary File 3 – Semi-structured interview and focus group guide

**Demographic questions**

I first have some questions about yourself.

1. What gender do you identify as?
2. Do you identify as LGQBTI+?
3. Are you Aboriginal and/or Torres Strait Islander or both?
4. Were you born in Australia?
5. What culture do you identify with?
6. Is English your first language?
7. Do you have a lived experience of being in out-of-home care?

**Semi-structured guide, additional follow up prompts were included**

1. How would you describe your role in transition planning
2. When you hear the phrase ‘transition planning’, what comes to mind about it entails?
3. How would you define a successful transition from care?
4. How is it determined that a young person is ready to transition from care?
5. How do you know how to deliver transition planning?
6. How are young people involved in transition planning?
7. How are young people supported to engage in education during their transition from care?
8. How are young people supported to gain employment during their transition from care?
9. How often are the key components <identified earlier in the interview> of transition planning delivered in practice?
10. How suitable is transition planning for young people’s needs?
11. How satisfied are you with the current transition planning process?
12. What are the barriers to the <key components of transition planning> being delivered in practice?
13. What enables the <key components of transition planning> being delivered in practice?

**Suggestions for change**

If you had a magic wand with the power to improve the transition from care planning process and outcomes for young people

- What would you stop doing?
- What would you start doing?
- What would you keep?
